# Supplementary material
Source: MDPI journal article supplement (https://www.mdpi.com/2075-163X/12/8/971)
Supplement: s1 [file s1]

**Table S1.** In-situ LA-ICP-MS S isotope and trace element compositions of pyrite from the Lijiapuzi gold deposit.

| No.   |     | $\delta^{34}\text{S}$<br>/‰ | Co<br>/ppm | Ni<br>/ppm | Cu<br>/ppm | As<br>/ppm | Mo<br>/ppm | Ag<br>/ppm | Sb<br>/ppm | Au<br>/ppm | Pb<br>/ppm |
|-------|-----|-----------------------------|------------|------------|------------|------------|------------|------------|------------|------------|------------|
| P1-1  | Py1 | 11.03                       | 3.32       | 190.83     | 0.04       | 0.1        | 0.059      | 5.81       | 1.57       | -          | 0.23       |
| P1-2  | Py1 | 11.27                       | 14.84      | 1669.95    | 0.52       | 0.9        | 0.037      | -          | 0.58       | 2.6        | 1.74       |
| P1-3  | Py1 | 9.46                        | 0.87       | 4.80       | 0.83       | 0.5        | 0.015      | 6.24       | 1.36       | 2.9        | 1.85       |
| P1-4  | Py1 | 9.55                        | 0.90       | 9.31       | 1.61       | 5.2        | -          | 7.01       | 3.43       | -          | 17.22      |
| P1-5  | Py1 | 9.19                        | 3.92       | 144.92     | 0.22       | 12.3       | 0.018      | -          | 8.48       | -          | 0.63       |
| P1-6  | Py1 | 9.46                        | 1.21       | 222.52     | 0.62       | 7.4        | 0.022      | -          | 0.09       | -          | 1.18       |
| P12-1 | Py2 | 11.12                       | 12.07      | 156.55     | 3.15       | 2.2        | 0.028      | 0.81       | 8.24       | 7.4        | 46.99      |
| P12-2 | Py1 | 10.75                       | 6.33       | 210.84     | 1.18       | 2.2        | 0.015      | -          | 2.07       | 2.4        | 22.05      |
| P12-3 | Py1 | 9.62                        | 4.79       | 571.52     | 5.59       | 6.7        | 0.023      | 5.10       | 12.67      | -          | 34.63      |
| P12-5 | Py2 | 11.49                       | 4.65       | 423.65     | 9.50       | 6.0        | 0.003      | 3.60       | 11.80      | 8.1        | 96.98      |
| P12-6 | Py2 | 11.10                       | 1.92       | 334.97     | 1.23       | 2.6        | -          | 3.27       | 2.51       | 5.7        | 22.09      |
| P21-1 | Py1 | 11.04                       | 147.29     | 5.11       | 2.20       | 11.1       | 0.009      | 12.74      | 7.66       | 2.9        | 64.92      |
| P21-2 | Py2 | 11.04                       | 242.98     | 4.47       | 3.21       | 16.8       | -          | 15.27      | 29.57      | 41.3       | 38.64      |
| P21-3 | Py1 | 10.33                       | 199.10     | 3.46       | 0.48       | 35.7       | 0.003      | -          | 0.73       | -          | 10.49      |
| P21-4 | Py2 | 10.19                       | 74.09      | 12.66      | 1.36       | 7.3        | 0.011      | 18.35      | 11.53      | 21.2       | 34.15      |
| P21-5 | Py2 | 11.15                       | 217.70     | 4.28       | 0.63       | 73.9       | 0.011      | 7.49       | 27.67      | 61.3       | 10.12      |
| P22-1 | Py1 | 9.19                        | 44.21      | 346.52     | 0.32       | 3.3        | 0.004      | 0.13       | 4.38       | -          | 21.36      |
| P22-2 | Py1 | 9.80                        | 24.07      | 166.34     | 1.39       | 2.0        | 0.012      | -          | 3.48       | -          | 17.30      |
| P22-3 | Py2 | 9.49                        | 53.89      | 7.32       | 1.66       | 3.6        | 0.009      | 1.12       | 13.73      | 29.1       | 32.42      |
| P22-4 | Py1 | 9.81                        | 492.85     | 6.22       | 0.06       | 6.0        | -          | -          | 0.26       | -          | 0.16       |
| P22-5 | Py1 | 9.75                        | 346.93     | 1.54       | 0.09       | 36.9       | -          | -          | 0.16       | -          | 0.16       |
| P22-6 | Py1 | 9.85                        | 1.57       | 43.69      | -          | 0.3        | 0.009      | -          | 0.00       | 1.7        | 0.36       |
| P3-1  | Py2 | 10.88                       | 175.58     | 80.07      | 0.10       | 135.5      | -          | 4.71       | 0.40       | 7.5        | 1.25       |
| P3-2  | Py1 | 10.81                       | 177.86     | 80.82      | 0.06       | 86.8       | 0.007      | 1.39       | 3.40       | -          | 0.64       |
| P3-3  | Py2 | 10.97                       | 315.41     | 250.53     | 0.13       | 7.2        | -          | 3.05       | 1.05       | 5.6        | 0.68       |
| P3-4  | Py1 | 10.99                       | 321.03     | 157.10     | 0.04       | 14.1       | 0.011      | 2.36       | 0.85       | 2.8        | 0.74       |
| P3-5  | Py2 | 10.79                       | 245.25     | 315.46     | 4.99       | 14.5       | 0.013      | 9.48       | 18.41      | 8.7        | 131.19     |
| P31-1 | Py1 | 10.98                       | 333.00     | 140.03     | 0.31       | 16.9       | 0.003      | 5.06       | 10.02      | -          | 1.61       |
| P31-2 | Py1 | 11.16                       | 255.94     | 127.32     | 0.06       | 13.7       | -          | 0.69       | 0.00       | -          | 0.45       |
| P31-3 | Py1 | 11.24                       | 225.12     | 154.13     | 0.00       | 6.4        | -          | -          | 0.00       | -          | 0.20       |
| P31-4 | Py1 | 11.12                       | 236.05     | 123.18     | 0.88       | 42.9       | -          | -          | 55.06      | -          | 10.87      |
| P31-5 | Py1 | 11.20                       | 245.52     | 131.62     | -          | 16.1       | 0.011      | 1.18       | 0.00       | -          | 0.11       |
| P32-1 | Py1 | 11.03                       | 224.16     | 92.41      | 0.09       | 21.1       | -          | 3.35       | 0.00       | -          | 0.30       |
| P32-2 | Py1 | 11.03                       | 236.32     | 109.62     | 0.37       | 51.8       | -          | 5.04       | 4.53       | -          | 0.73       |
| P32-3 | Py1 | 10.88                       | 206.84     | 189.39     | 0.28       | 7.0        | 0.004      | 4.65       | 0.00       | -          | 0.94       |
| P32-4 | Py1 | 10.69                       | 162.88     | 98.81      | 0.19       | 341.8      | 0.000      | 1.42       | 0.50       | -          | 0.57       |
| P32-5 | Py1 | 10.79                       | 203.26     | 108.88     | 0.35       | 78.7       | 0.019      | 1.34       | 1.36       | -          | 5.40       |
